# Supplementary material
Source: PubMed Central journal article supplement (PMC9726644)
Supplement: mmc1.pdf [file mmc1.pdf]

**Cell Reports, Volume 41**

**Supplemental information**

**SARS-CoV-2 infects neurons  
and induces neuroinflammation  
in a non-human primate model of COVID-19**

**Danielle Beckman, Alyssa Bonillas, Giovanne B. Diniz, Sean Ott, Jamin W. Roh, Sonny R. Elizaldi, Brian A. Schmidt, Rebecca L. Sammak, Koen K.A. Van Rompay, Smita S. Iyer, and John H. Morrison**

## A Methodological design

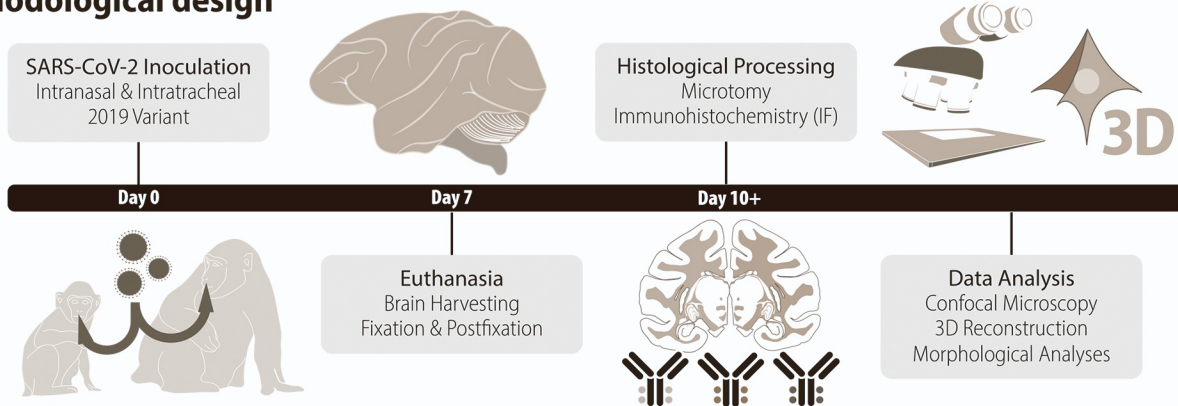

## B Major cell types and targets

| SARS-CoV-2 virus                                                                  | Neuron                                                                            | Microglia                                                                         | Astrocyte                                                                         | Neutrophil                                                                        | Myelin                                                                             | Brain vasculature                                                                   | Synaptic markers                                                                    |
|-----------------------------------------------------------------------------------|-----------------------------------------------------------------------------------|-----------------------------------------------------------------------------------|-----------------------------------------------------------------------------------|-----------------------------------------------------------------------------------|------------------------------------------------------------------------------------|-------------------------------------------------------------------------------------|-------------------------------------------------------------------------------------|
|  |  |  |  |  |  |  |  |
| Spike protein<br>Nucleocapsid<br>dsRNA                                            | NeuN<br>Pan NF<br>NF-H                                                            | Iba1<br>MHC Class II (HLA-Dr)                                                     | GFAP<br>Aquaporin 4                                                               | MPO<br>CD66a                                                                      | MBP<br>dgMBP                                                                       | Claudin-5<br>Collagen IV                                                            | PSD95<br>Synaptophysin                                                              |
| MAP2<br>NF-L<br>MHC I<br>Ace2                                                     |                                                                                   |                                                                                   |                                                                                   |                                                                                   |                                                                                    |                                                                                     |                                                                                     |

## C List of primary antibodies used in this study

| Target Protein                                     | Species    | Clonality  | Isotype  | Dilution    | Vendor and product code      | #RRID       |
|----------------------------------------------------|------------|------------|----------|-------------|------------------------------|-------------|
| Angiotensin-Converting Enzyme 2 (ACE2)             | Rabbit     | Polyclonal | IgG      | 1:100-1:400 | Abcam ab15348                | AB_301861   |
| Angiotensin-Converting Enzyme 2 (ACE2)             | Goat       | Polyclonal | IgG      | 1:50-1:100  | R&D Systems AF933            | AB_355722   |
| Aquaporin 4 (AQ4)                                  | Guinea Pig | Polyclonal | IgG      | 1:500       | Synaptic Systems 429004      | AB_2802156  |
| Cluster of Differentiation 66a (CD66a)             | Rat        | Monoclonal | IgG2a    | 1:500       | Bio-Rad MCA1147G             | AB_323396   |
| Claudin-5                                          | Rabbit     | Monoclonal | IgG      | 1:500       | Abcam ab131259               | AB_11157940 |
| Collagen Type IV (Collagen IV)                     | Goat       | Polyclonal | IgG      | 1:100       | Millipore AB769              | AB_11210995 |
| Degraded Myelin Basic Protein (dgMBP)              | Rabbit     | Polyclonal | IgG      | 1:500       | US Biological M9758-04       | -           |
| Double-stranded RNA (dsRNA)                        | Mouse      | Monoclonal | IgG2a    | 1:400       | SciCons 10010200             | AB_2651015  |
| Glial Fibrillary Acidic Protein (GFAP)             | Chicken    | Polyclonal | IgY      | 1:1000      | Abcam ab4674                 | AB_304558   |
| Ionized calcium binding adaptor molecule 1 (Iba1)  | Rabbit     | Polyclonal | IgG      | 1:500       | Fujifilm Wako 019-19741      | AB_839504   |
| Ionized calcium binding adaptor molecule 1 (Iba1)  | Mouse      | Monoclonal | IgG2b    | 1:500       | Fujifilm Wako NCNP24         | AB_2811160  |
| Microtubule-Associated Protein 2 (MAP2)            | Guinea Pig | Polyclonal | IgG      | 1:1000      | Synaptic Systems 188004      | AB_2138181  |
| Major Histocompatibility Complex Class I (HLA-E)   | Rabbit     | Monoclonal | IgG      | 1:200       | Novus Bio NBP2-66946         | AB_2809803  |
| Major Histocompatibility Complex Class II (HLA-DR) | Mouse      | Monoclonal | IgG2b    | 1:200       | BioLegend 327002             | AB_893582   |
| Major Histocompatibility Complex Class II (HLA-DR) | Mouse      | Monoclonal | IgG2b    | 1:200       | Thermo Fisher MA5-11966      | AB_10979984 |
| Myelin Basic Protein (MBP)                         | Human      | Monoclonal | IgG1     | 1:500       | Abcam ab209328               | AB_2818988  |
| Myeloperoxidase (MPO)                              | Mouse      | Monoclonal | IgG1     | 1:500       | Bio-Rad MCA1757              | AB_2146467  |
| Neuronal Nuclear Protein (NeuN)                    | Guinea Pig | Polyclonal | IgG      | 1:500       | Synaptic Systems 266004      | AB_2619988  |
| Neuronal Nuclear Protein (NeuN)                    | Mouse      | Monoclonal | IgG1     | 1:500       | Millipore MAB377             | AB_2298772  |
| Neurofilament- Heavy (NF-H)                        | Mouse      | Monoclonal | IgG1     | 1:200       | BioLegend 801701             | AB_2715852  |
| Neurofilament- Heavy (NF-H)                        | Chicken    | Polyclonal | IgY      | 1:500       | Abcam ab4680                 | AB_304560   |
| Neurofilament- Light (NF-L)                        | Mouse      | Monoclonal | IgG1     | 1:500       | Millipore MAB1615            | AB_94285    |
| Pan-Neurofilament (Pan-NF)                         | Mouse      | Monoclonal | IgG1/IgM | 1:400       | Creative Diagnostic DMAB7133 | AB_2391764  |
| Postsynaptic Density Protein (PSD95)               | Goat       | Polyclonal | IgG      | 1:500       | Abcam ab12093                | AB_298846   |
| SARS-CoV-2 Nucleocapsid (N) protein                | Mouse      | Monoclonal | IgG2b    | 1:100       | Thermo Fisher MA1-7403       | AB_1018420  |
| SARS-CoV-2 Spike Protein                           | Rabbit     | Polyclonal | IgG      | 1:500       | Abcam ab272504               | AB_2847845  |
| SARS-CoV-2 Spike Protein                           | Human      | Monoclonal | IgG1     | 1:100       | Thermo Fisher 703958         | AB_2866477  |
| Synaptophysin 1                                    | Guinea Pig | Polyclonal | IgG      | 1:500       | Synaptic Systems 101004      | AB_1210382  |

**Figure S1. Methodological overview of the study, Related to STAR Methods.** (A) Schematic representation of the study methodology. Four young healthy (3.5-6 Y.O) and four aged (18-22 Y.O) rhesus monkeys were infected intranasally and intratracheally with SARS-CoV-2 (2019-nCoV/USA-WA1/2020; BEI Resources) at high dose ( $2.5 \times 10^6$  plaque-forming units [PFU]) and euthanized one week later. In addition, non-infected brains from diabetic and non-diabetic animals were processed in a similar way for the same microscopy analysis. (B) Major targets investigated in this study and the markers used to identify them. (C) List of primary antibodies used in this study.

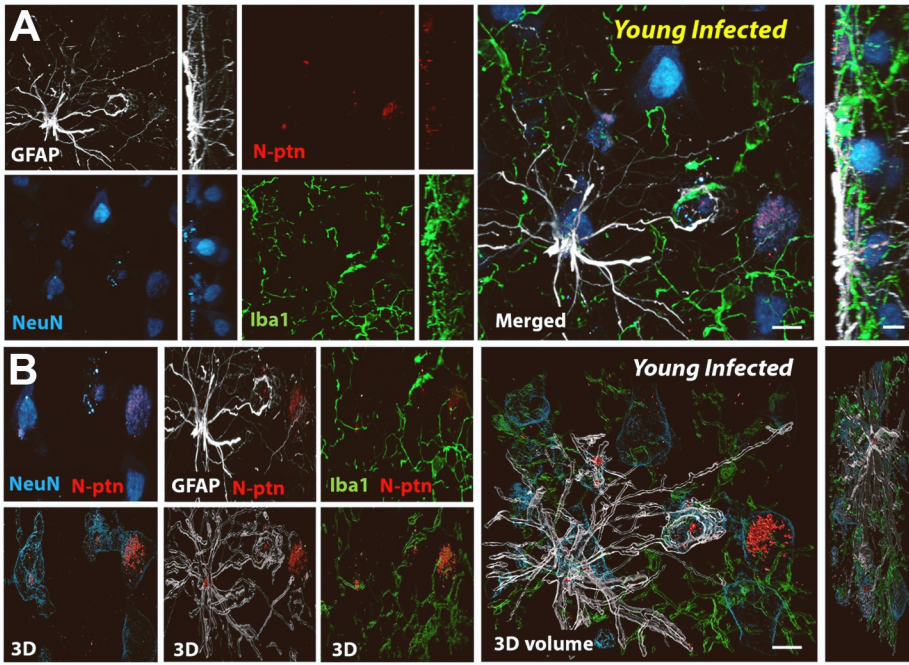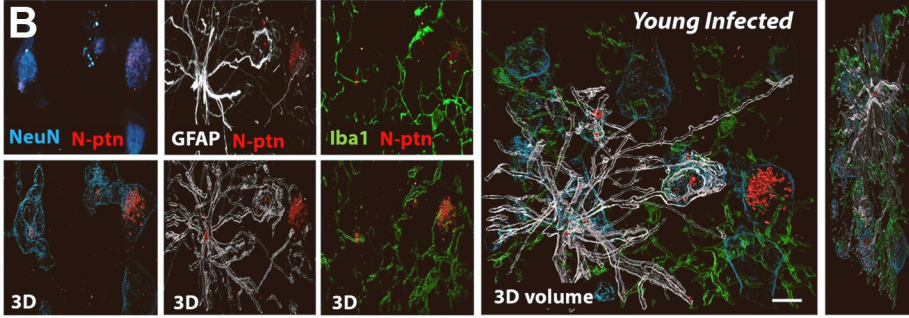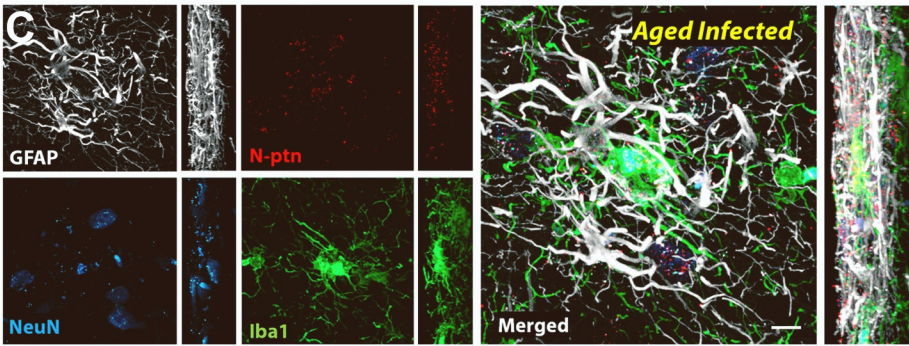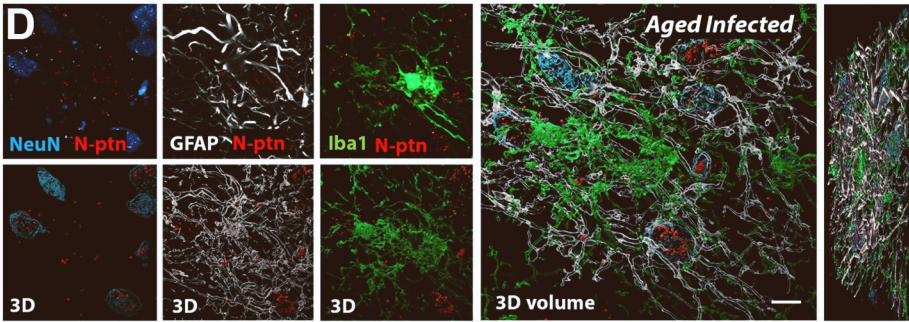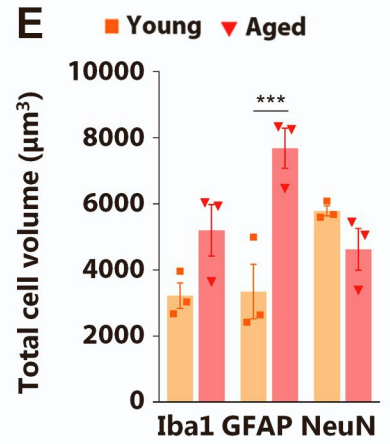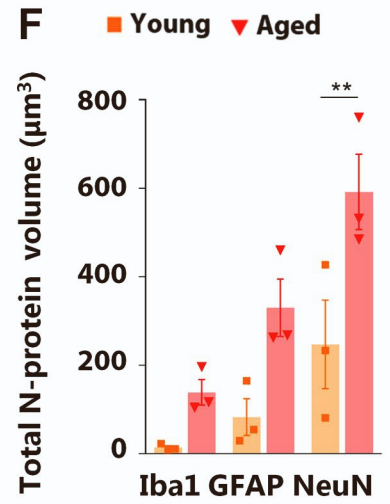

**G** Cell body 3D volume analysis

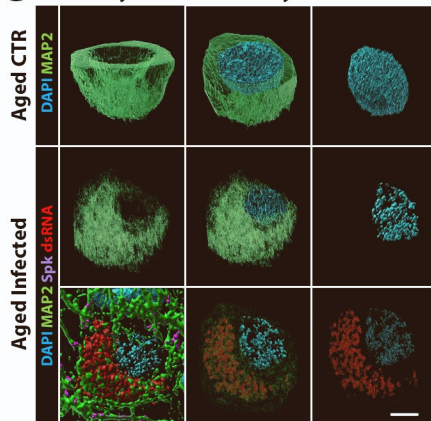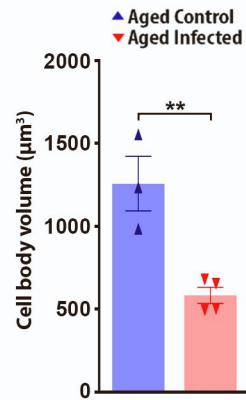

**H** Dendrite 3D volume analysis

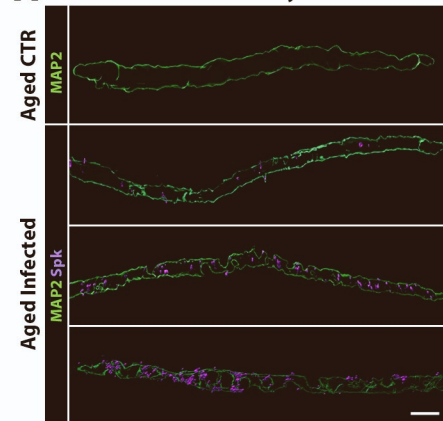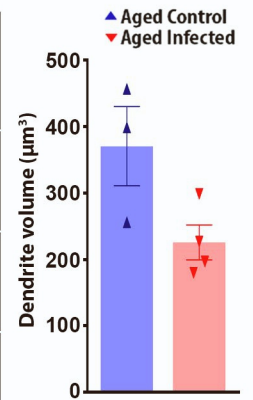

**Figure S2. Complementary volumetric analyses of neuronal morphology, infection tropism, and neuro-inflammation, Related to Figure 01. (A-F)** In young (A, B) and aged (C, D) infected animals, individual and combined channels are shown in the XY and XZ planes. In (B) and (D), detail of the original images and the 3D volume reconstructions used to identify and quantify the cell types infected and the total internalized viral volume. In comparison with young, infected animals, aged-infected monkeys present a significant increase in astrocyte hypertrophy in comparison with the other cell types (E, \*\*\* $p=0.0009$ ). In contrast, SARS-CoV2 nucleocapsid protein was detected in higher quantities in neurons and significantly in higher levels in aged, infected animals (F, \*\* $p= 0.0069$ ). Two-way ANOVA, Sidak's post hoc test. **(G, H)** To better understand the extensive neuronal cell damage observed in the primary olfactory cortex following SARS-CoV-2 infection, we developed a protocol to calculate how the virus affects the cell body and dendrites separately. In the cell body of neurons within layers I-III of the piriform cortex, dsRNA vesicles were found associated with degraded neuron-specific microtubule stabilizer MAP2, and a reduced cell body volume was observed in aged, infected animals in comparison with age-matched controls (G, \*\* $p=0.0032$ ). Dendritic beading, an early marker of neuronal injury and swelling, was observed within neuronal dendrites expressing high levels of spike protein and is correlated with decreased dendritic total volume (H, \* $p= 0.0571$ ). Unpaired t-test. Data are represented as mean  $\pm$  SEM. Scale bar: 50 $\mu$ m (A-D), 5 $\mu$ m (G, H).

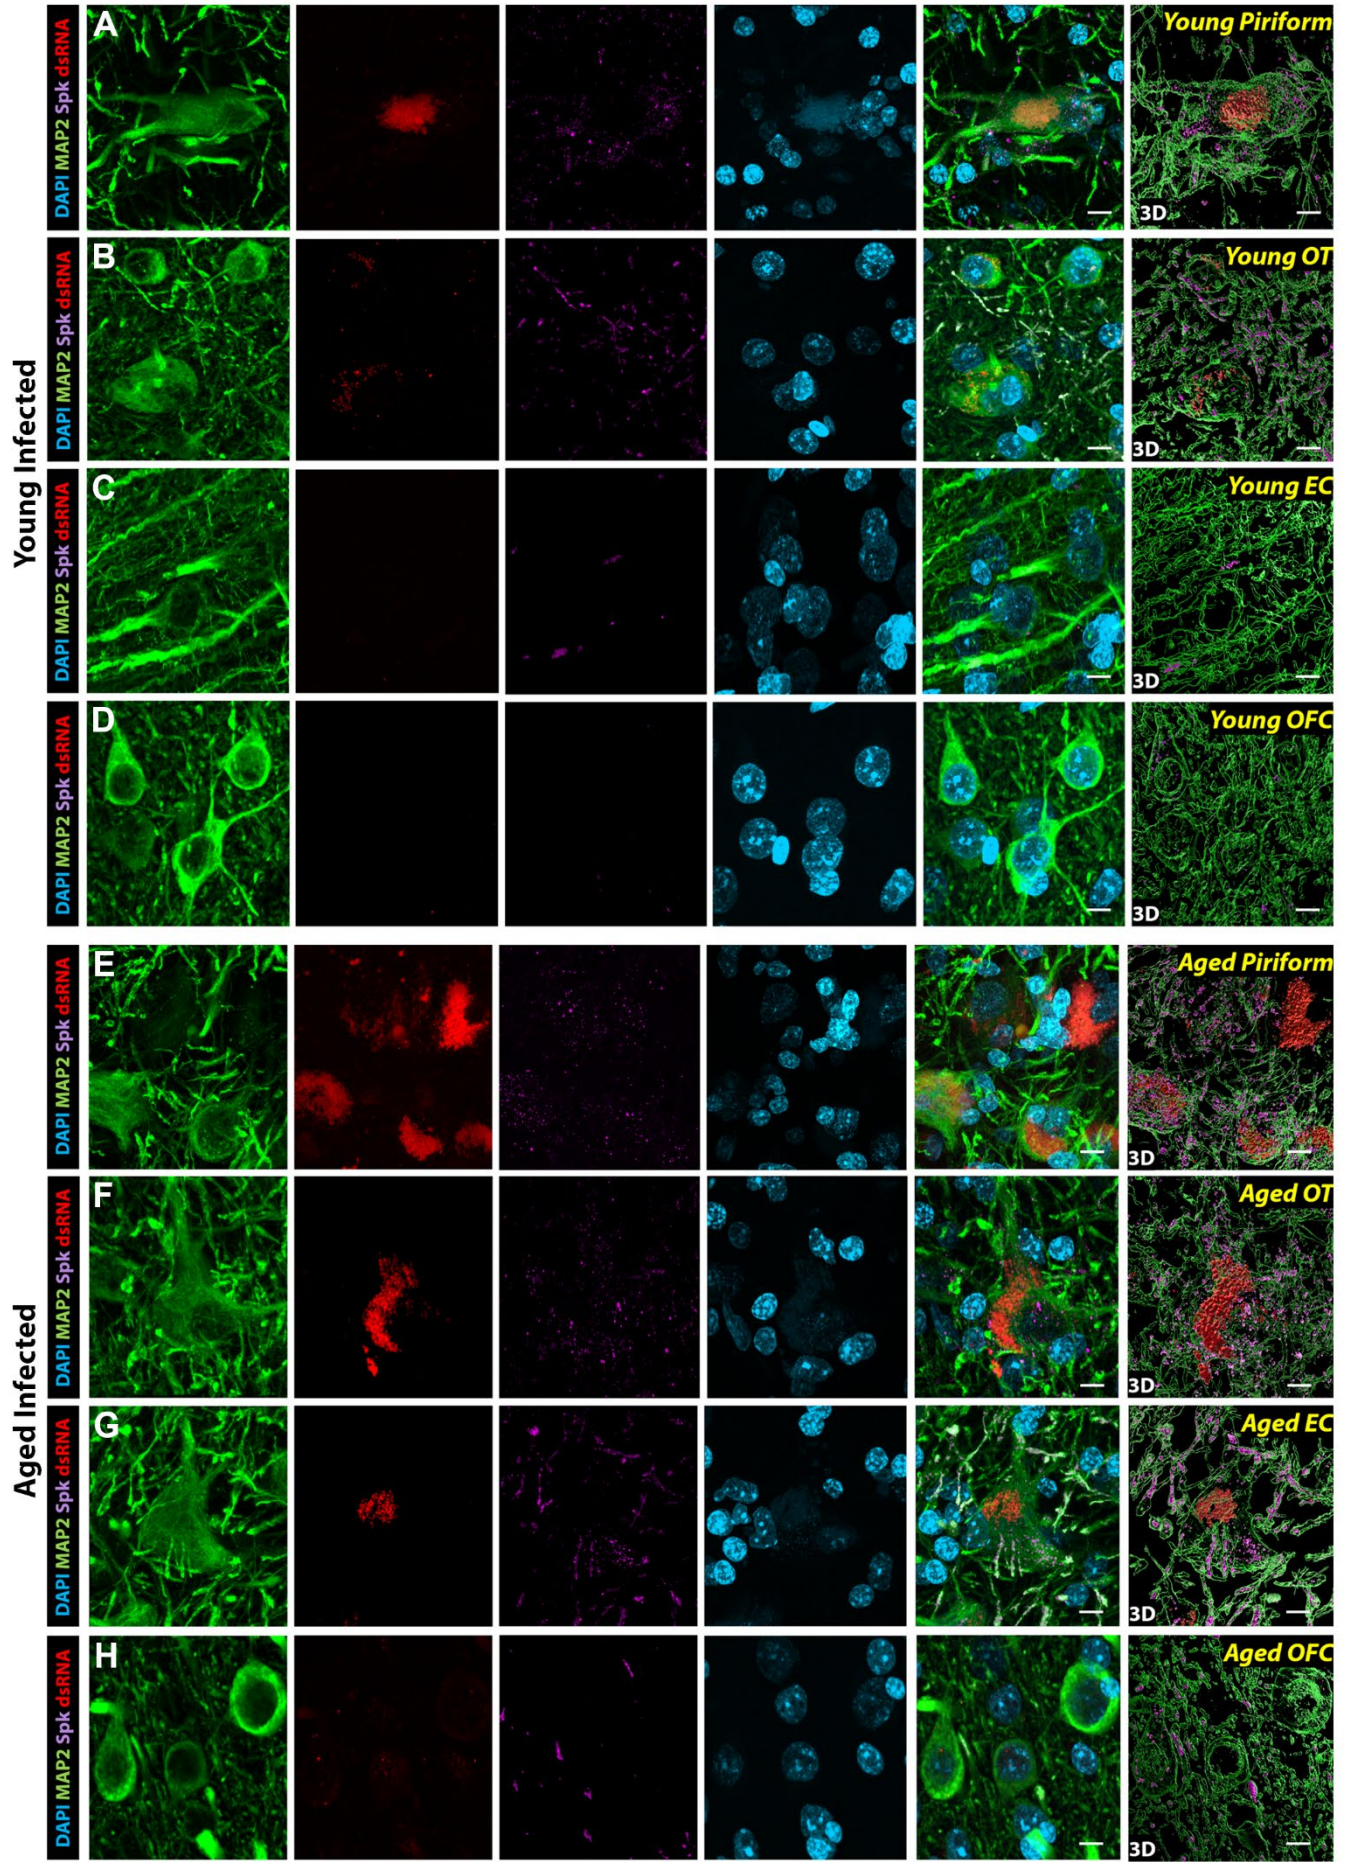

**Figure S3. Viral RNA and SARS-CoV2 spike protein in the olfactory cortex of infected animals, Related to Figure 01. (A-D)** Individual and merged representative micrographs and 3D volume reconstruction of olfactory regions of young, infected animals: piriform (A), olfactory tubercle (B), entorhinal cortex (C), and orbitofrontal cortex (D). Double-stranded RNA and SARS-CoV2 spike protein are strongly detected in primary but not secondary olfactory regions of young, infected monkeys. **(E-H)** Individual and merged representative micrographs and 3D volume reconstruction of olfactory regions of aged, infected animals: piriform (E), olfactory tubercle (F), entorhinal cortex (G), and orbitofrontal cortex (H). In comparison to young animals, aged-infected animals present considerably more neuronal infection and SARS-CoV2 viral protein spread reaching the OFC, presumably through neuronal connections. Scale bar: 50 $\mu$ m.

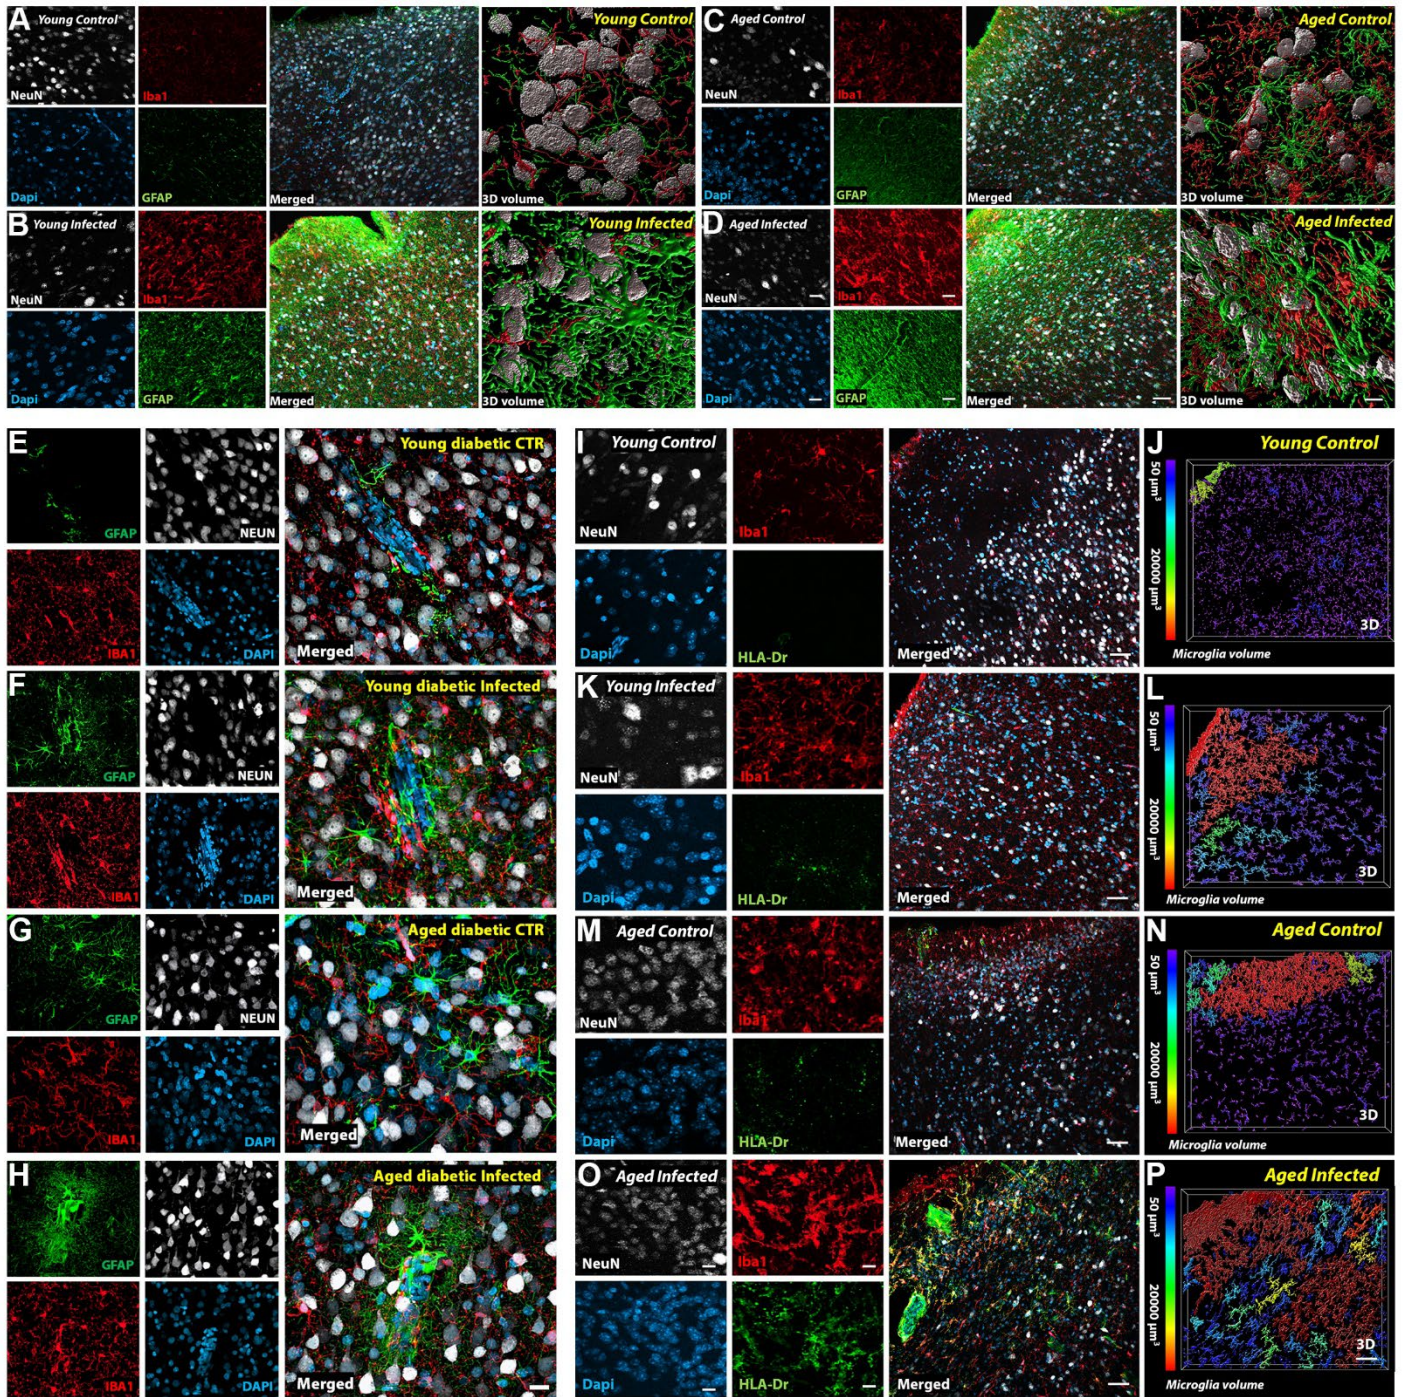

**Figure S4. Glial and vascular disruption induced by SARS-CoV-2 infection, Related to Figure 02.** (A-D) Each panel shows representative micrographs and 3D volume reconstructions of the experimental groups: (A) young control, (B) young infected, (C) aged control, and (D) aged infected monkeys. The individual and merged micrographs show astrocytes (GFAP) and microglia (Iba1) interaction with neurons (NeuN). Detailed 3D reconstruction analysis highlights the glia morphological profile change induced by the SARS-CoV2 infection in the brain. (E-H) Individual channels and merged images of the piriform cortex from young diabetic CTR (E), young SARS-CoV2 infected (F), aged diabetic CTR (G), and aged diabetic infected (H) monkeys. Morphological alterations in astrocytes (GFAP) and microglia (Iba1) were associated with the diabetes condition but worsened following SARS-CoV2 infection. (I-P) The human leukocyte antigen (HLA, type D.R.) is a major histocompatibility complex class II (MHCII) receptor expressed by the microglial population upon disturbances in the immunological homeostasis in the CNS, participating in the recruitment of CNS-infiltrating T cells. As shown in the representative individual and merged images of each group (I, K, M, O), there is an increased expression of this receptor in the aged-infected animals in comparison with the other groups. Notably, a heat-map representation of the microglia volume profile observed in the olfactory region (J, L, N, P) shows a progressive increase in the number of individual cells presenting



altered volume, a marker of cellular activation and neuronal damage (heat-map shows a range of microglia volume distribution from 50  $\mu\text{m}^3$ /blue to 2000  $\mu\text{m}^3$ /red). Scale bar: 100 $\mu\text{m}$  (A-D photomicrographs; I-P), 50 $\mu\text{m}$  (A-D 3D volumes), 45 $\mu\text{m}$  (E-H).

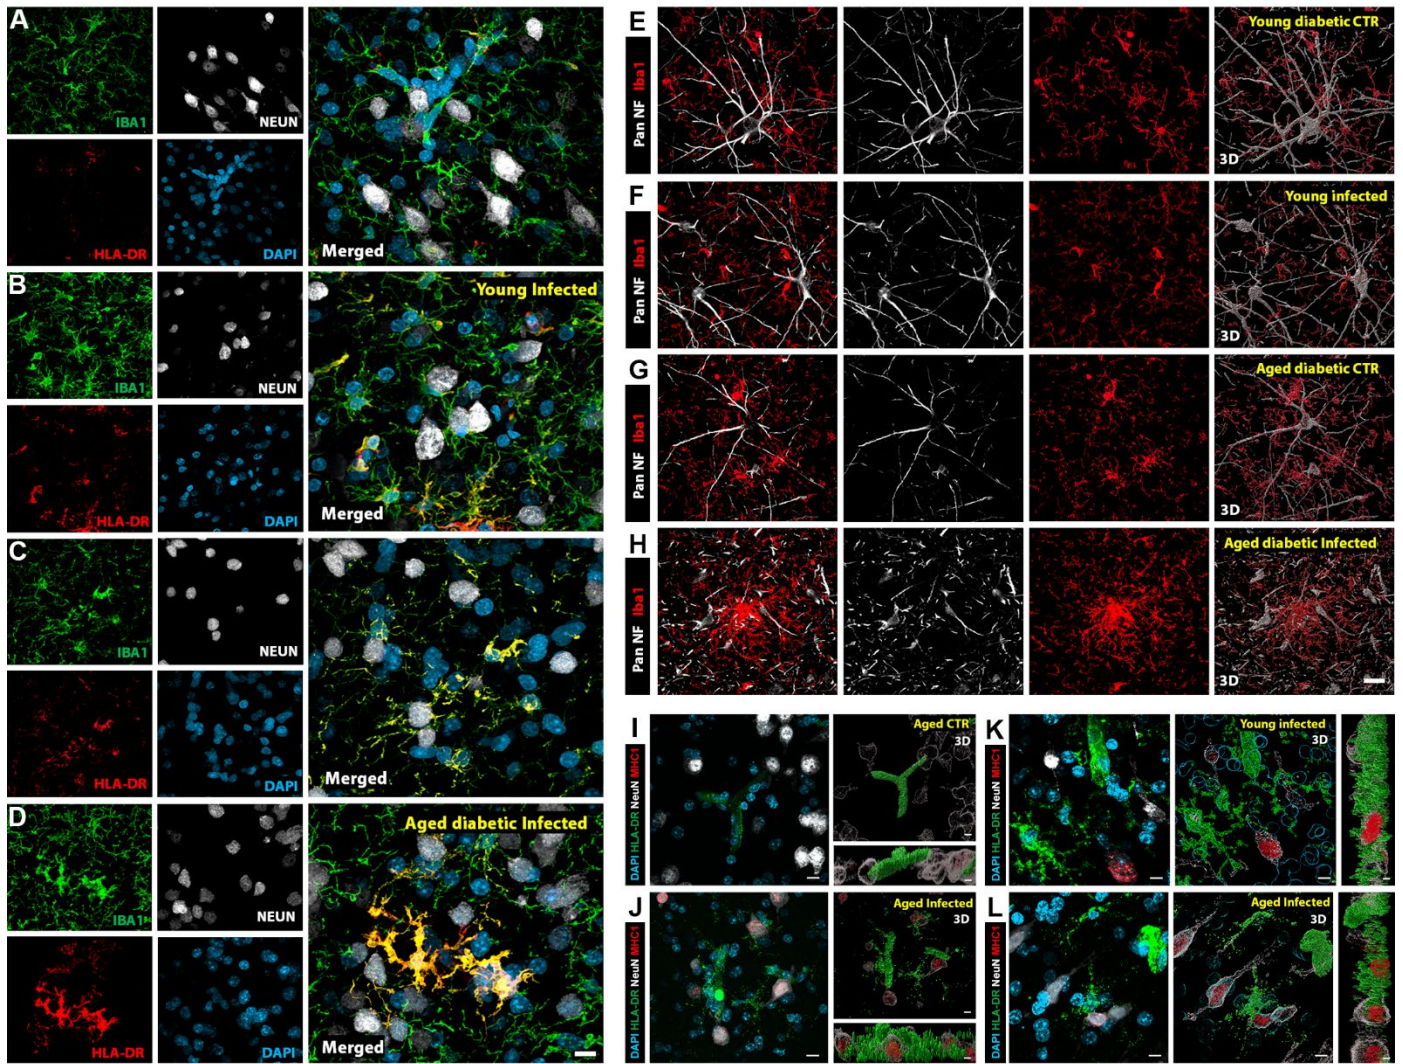

**Figure S5. SARS-CoV-2 neuroinfection is associated with MHC Class I and II upregulation and neuron-microglia interaction disruption, Related to Figure 02.** (A-D) Representative images from young diabetic CTR (A), young SARS-CoV2 infected (B), aged diabetic CTR (C), and aged diabetic infected (D) monkeys highlight the increased microglial expression of HLA-DR observed in both SARS-CoV2 infected groups. Increased HLA-DR expression was also observed in the aged diabetic CTR animal but was worsened by the viral infection. (E-H) Using pan NF as a neuronal marker and Iba1 to label microglia, we applied Airyscan super-resolution microscopy to investigate how diabetes and SARS-CoV2 infection alter neuron-microglia dynamics. In young diabetic CTR (E) and young infected (F) animals, no substantial alterations were found in the primary olfactory cortex. On the other hand, a more activated microglial profile was observed in the aged diabetic CTR (G) and was notably worsened by SARS-CoV2 infection, as shown in the representative micrograph from an aged diabetic infected animal (H). (I-L) In aged control monkeys, HLA-DR is usually found in low quantities surrounding intact blood vessels, in physiological balance with the neuronal and glial population. On the other hand, MHC1 is not generally expressed in healthy adult brains, and no expression was detected in the aged CTR brain (I). Following the viral infection in aged animals, microglia cells expressing the MHC class II receptor HLA-DR are recruited locally and found in association with altered blood vessels and MHC1+ neurons (J). Both classes of proteins are essential for the recognition of cytotoxic T cells and markers of T cell infiltration in the brain. To further understand the role of the antigen presentation by MHC proteins in the brain following SARS-CoV-2 infection in young and aged infected animals, we further analyzed the expression of both adaptive immunity markers in the olfactory cortex using 3D volumetric reconstruction. As shown in representative images in (K) and (L), in both the XY and XZ planes, neurons MHC1+ and microglia HLA-DR+ in association with disruptive blood vessels are found in both infected groups, but with higher frequency in the aged, infected animals. Scale bar: 20µm (A-D), 10µm (E-L photomicrographs), 5µm (I-L 3D Volumes).

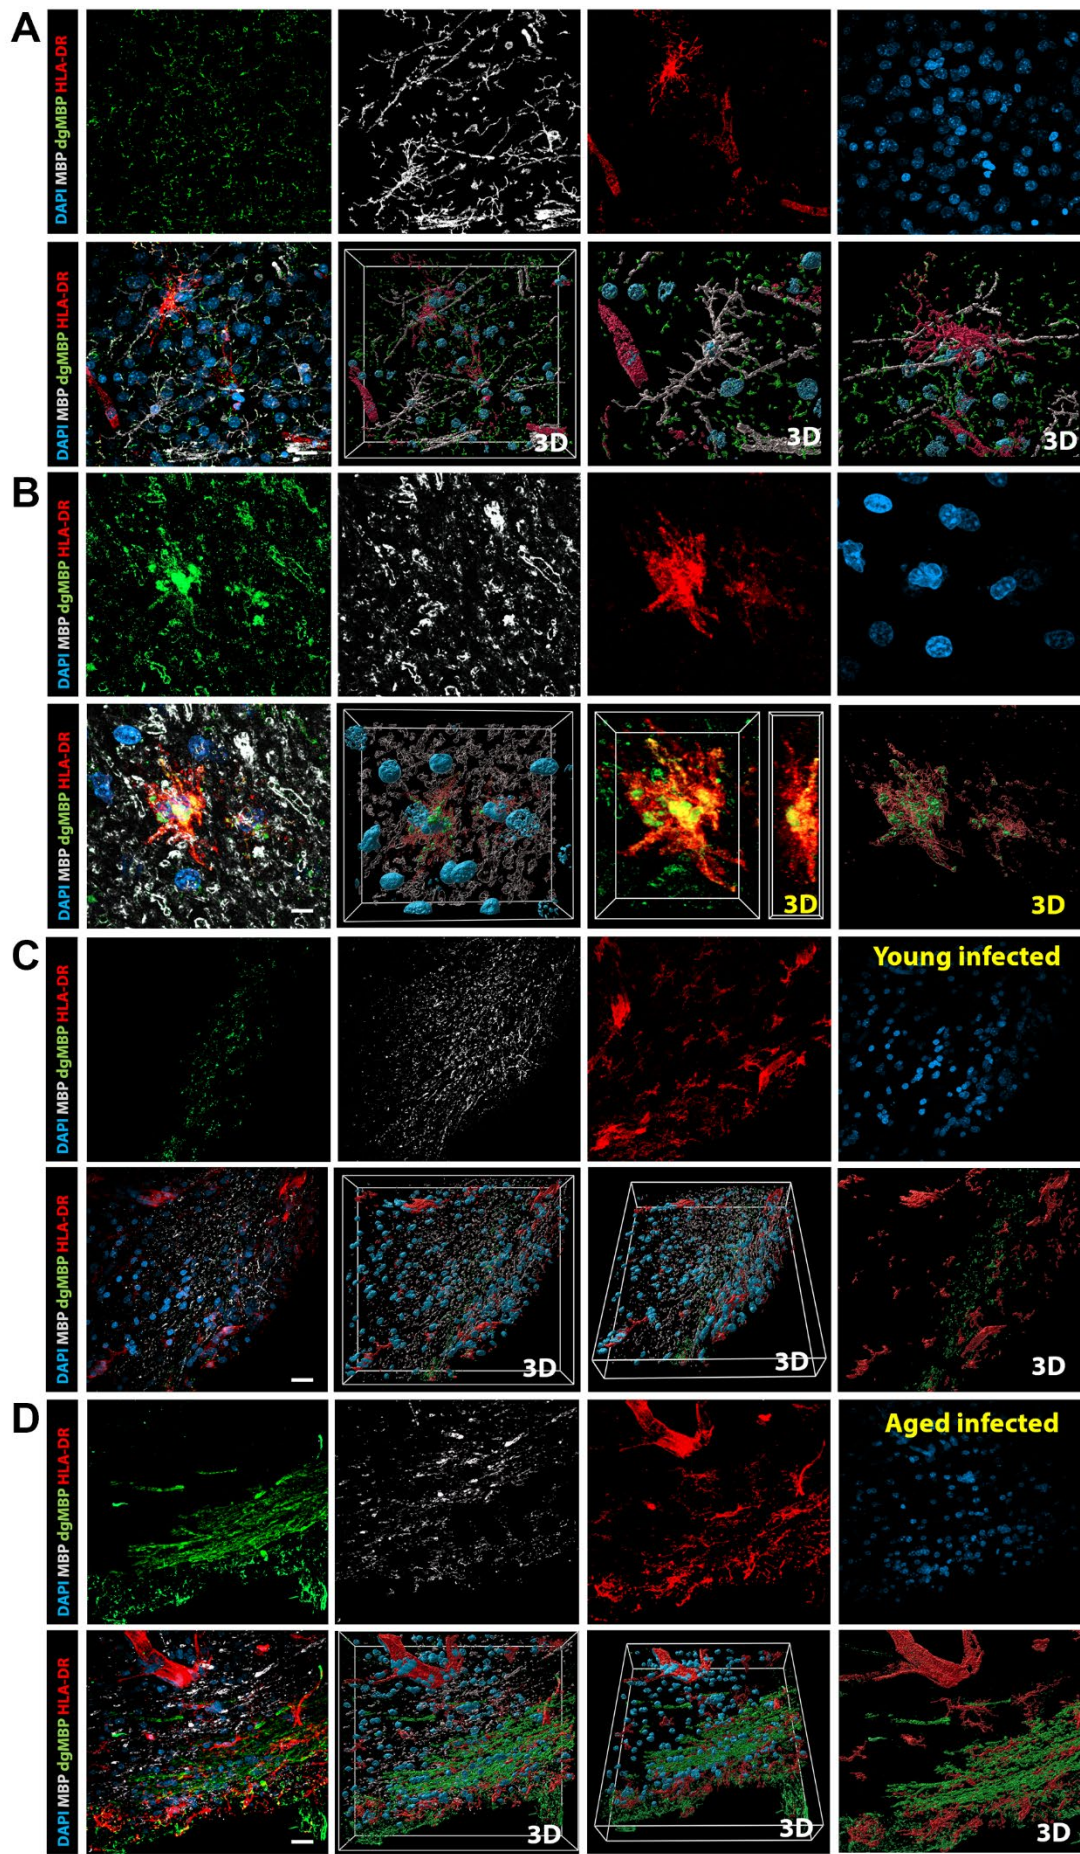

**Figure S6. Increased expression of degraded myelin and HLA-DR expression found in SARS-CoV2 infected animals, Related to Figure 02.** A combination of antibodies targeting normal (MBP, white) and degraded myelin (dgMBP, green) were used with HLA-DR (microglia and blood vessels) and DAPI. Three-dimensional analyses in the piriform cortex show increased expression of dgMBP at the expense of the normal MBP, associated with increased HLA-DR expression (A, B). Comparison of the piriform cortex from young and aged infected animals highlights an increased presence of dgMBP, associated with increased expression of HLA-DR (C, D). Scale bar: 50 $\mu$ m.

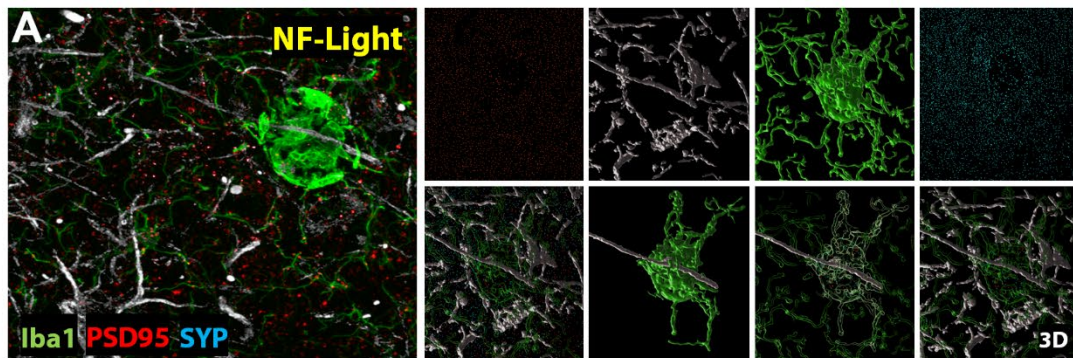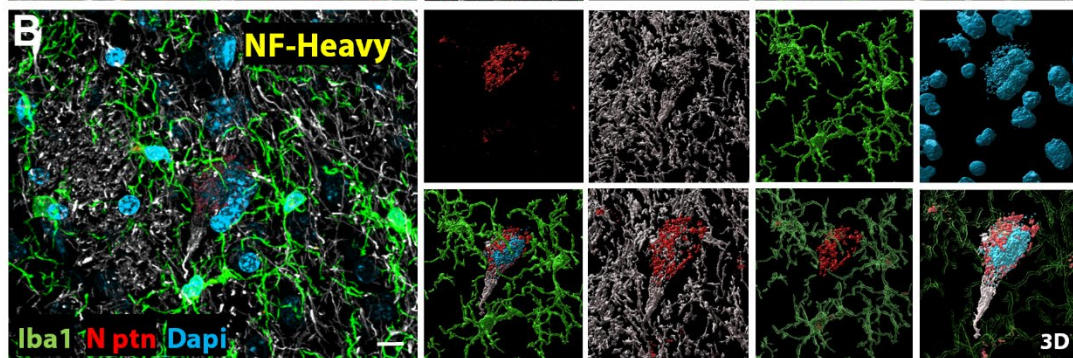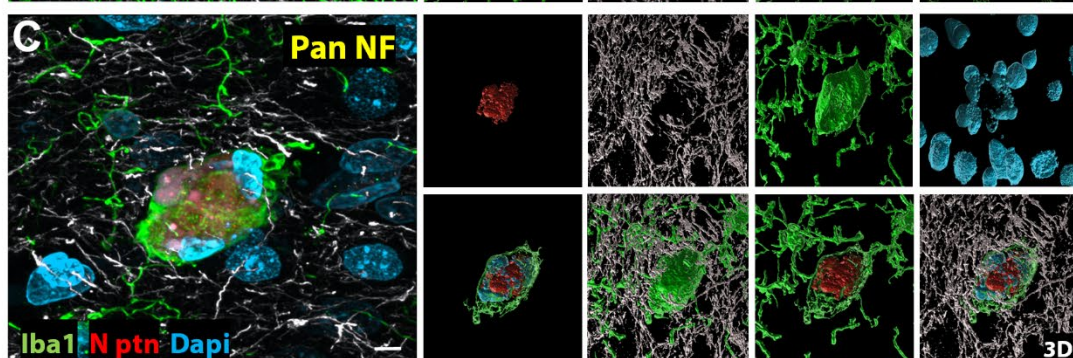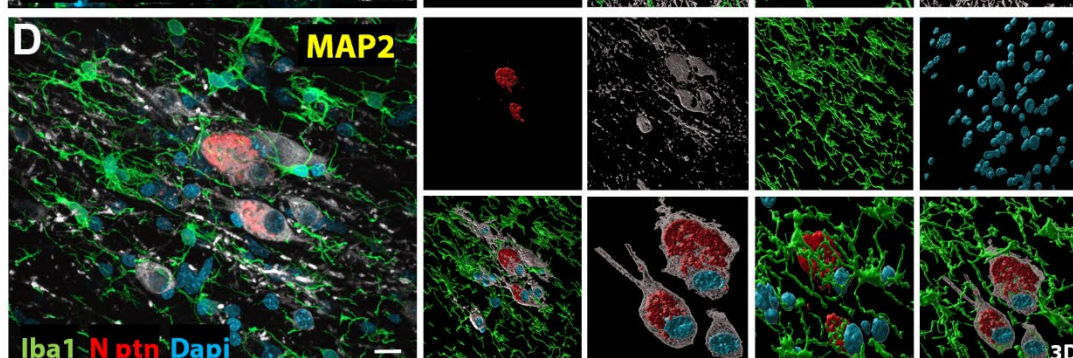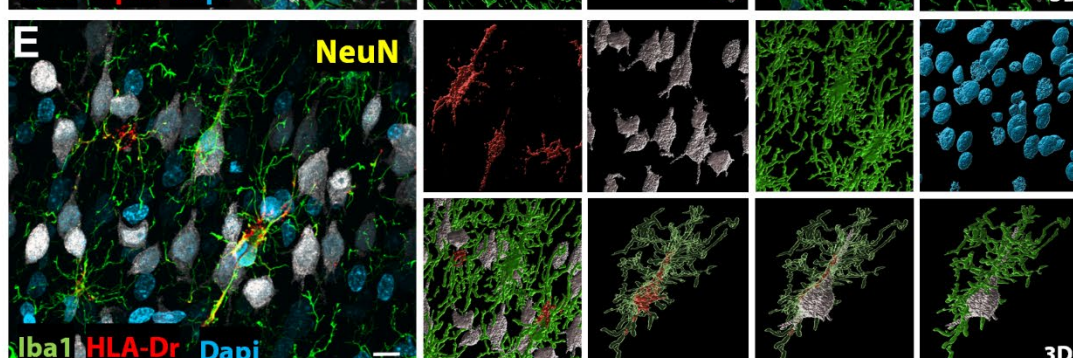

**Figure S7. SARS-CoV-2 presence in the brain distorts regular neuron-microglia interaction, Related to Figure 02.**

Multilabel fluorescence microscopy was performed targeting several neural proteins involved in synaptic transmission and neuron-glia interaction. For this analysis, adjacent stereological sections (every 50  $\mu\text{m}$ ) of the primary olfactory cortex from infected monkeys were used. As shown in (A), clusters of microglia (Iba1) are actively interacting with dendrites (neurofilament light, NF-L), and the presence of presynaptic marker synaptophysin (SYP) and postsynaptic marker (PSD95), were observed in abundance within reactive microglia. Interestingly, as demonstrated in (B), neurons expressing the SARS-CoV-2 nucleocapsid protein (N ptn) still present a more preserved neurofilament-heavy (NF-H) structure. (C) Utilizing pan NF marker combined with Iba1, we were able to detect entire neurons expressing N ptn being engulfed by reactive microglia. The reactive profile of the microglia interacting with neurons was confirmed by combining microglia general marker Iba1 and activated microglia marker HLA-DR (D). Scale bar: 50  $\mu\text{m}$ .

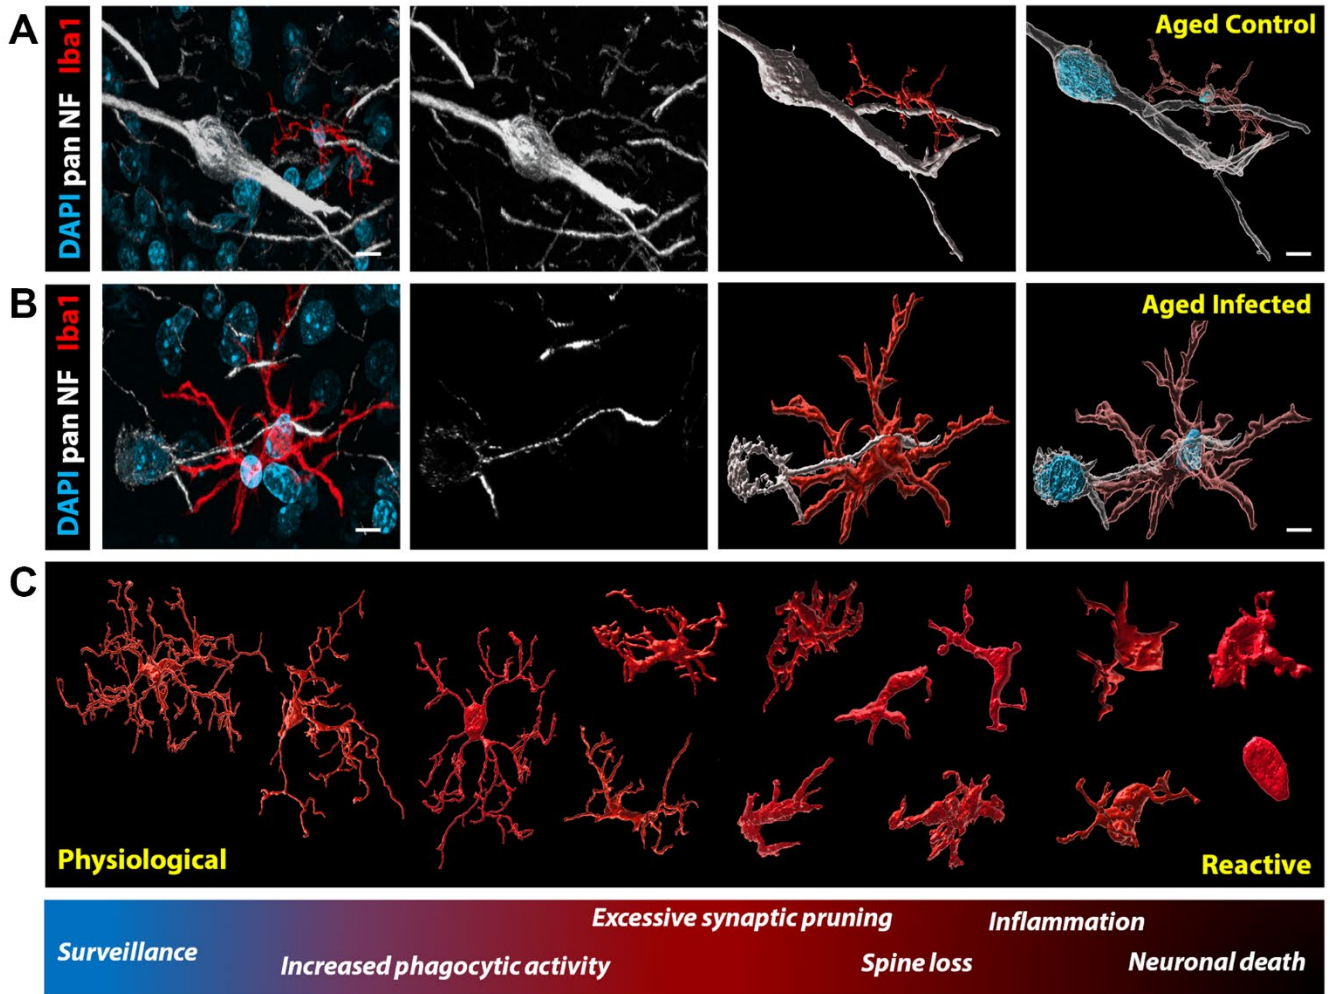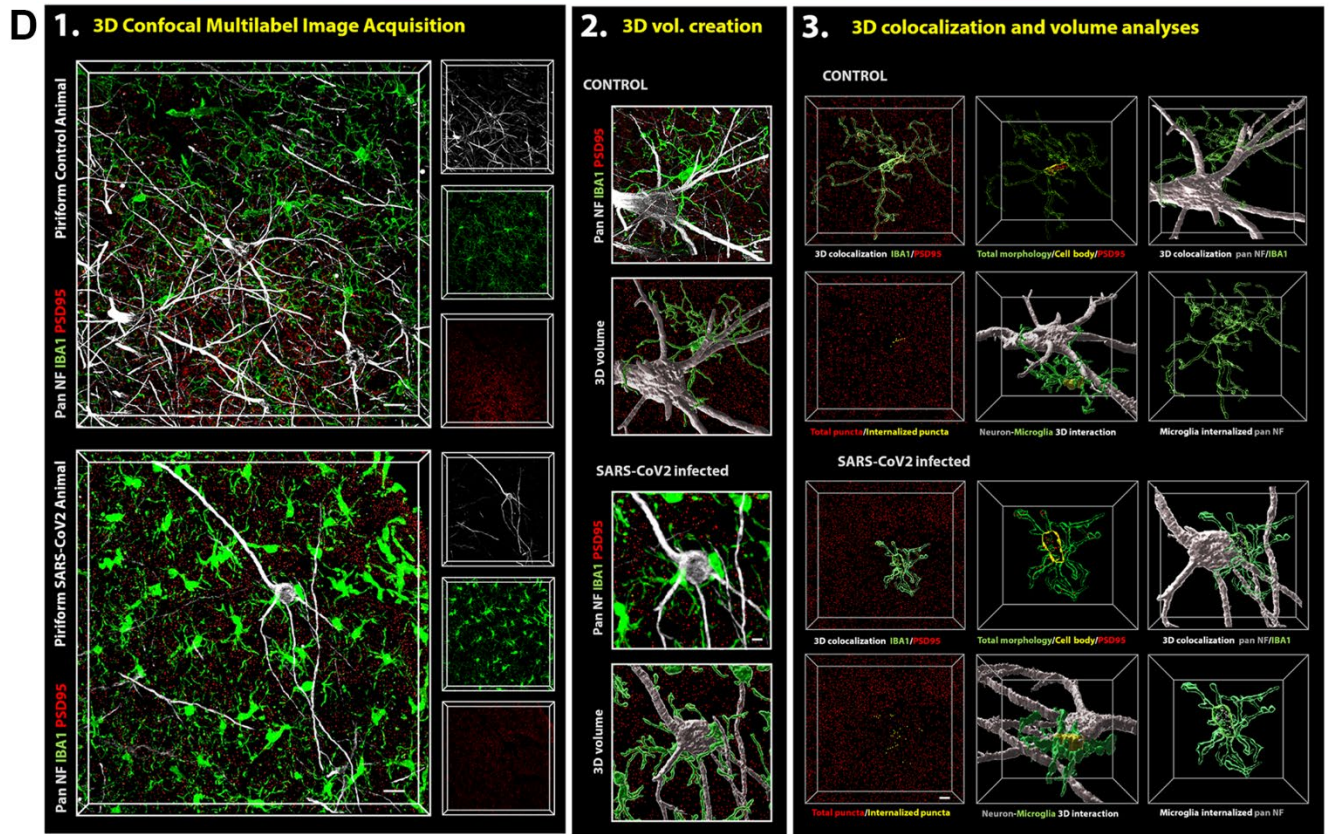

**Figure S8. Overview of the super-resolution Airyscan microscopy and 3D Segmentation employed to examine cellular morphology, neuron-microglia interactions, and PSD95 puncta engulfment, Related to STAR Methods. (A-C)** Compared with age-matched controls (A), high-resolution microscopy analysis of the primary olfactory cortex of infected animals presents abnormal microglia and fragmented/dying neuron interaction (B). Full detailed 3D reconstruction of microglia shows dynamic changes in this cell type profile, closely related to neuroinflammatory process and neurodegeneration (C). **(D)** To investigate the microglial engulfment of synaptic markers and neuronal proteins, micrographs were first acquired using a 63x objective in a confocal microscope (Step 1). Next, images were exported to Imaris software, and a 3D volume surface was created for each marker analyzed (Step 2). The cell body (yellow) and total volumes (green) for each microglia were calculated, as well as the 3D puncta volume of PSD95 (Step 3). Engulfment activity was measured by quantifying the volume of internalized PSD 95 ( $\mu\text{m}^3$ ) divided by the total volume of the involved microglia cell ( $\mu\text{m}^3$ ). Scale bar: 5 $\mu\text{m}$  (A-C), 50 $\mu\text{m}$  (D).



**Table S1. Information regarding the animals used in this study, including chronic illness and treatments, Related to the STAR methods.**

|                | Animal number | Sex    | Age | Chronic Illness                                                                                    |
|----------------|---------------|--------|-----|----------------------------------------------------------------------------------------------------|
| Young Control  | MMU-1         | Female | 6   | Endometriosis                                                                                      |
|                | MMU-12        | Female | 4   | None                                                                                               |
|                | MMU-13        | Male   | 12  | Diabetes, cystitis; Concurrent medication: Lantus (insulin glargine)                               |
| Young infected | MMU-6         | Female | 4   | None                                                                                               |
|                | MMU-3         | Female | 5   | Endometriosis                                                                                      |
|                | MMU-11        | Male   | 4   | None                                                                                               |
| Aged Control   | MMU-5         | Female | 6   | Endometriosis                                                                                      |
|                | MMU-8         | Female | 19  | Cecal Adenocarcinoma                                                                               |
|                | MMU-10        | Female | 21  | Hepatic Amyloidosis, Endometriosis                                                                 |
| Aged infected  | MMU-14        | Male   | 23  | Diabetes, obesity and suspected tract infection. Concurrent medication: Tresiba (insulin degludec) |
|                | MMU-2         | Female | 20  | Diabetes, gastrointestinal adenocarcinoma. Concurrent medication: Tresiba (insulin degludec).      |
|                | MMU-4         | Female | 24  | Diabetes, hypertension. Concurrent medication: Lantus (insulin glargine), pioglitazone.            |
|                | MMU-7         | Female | 22  | Diabetes, endometriosis, diverticulosis. Concurrent medication: Tresiba (insulin degludec)         |
|                | MMU-9         | Female | 18  | Diabetes, Hypertension. Concurrent medication: Tresiba (insulin degludec).                         |

| Animal number           |                      | MMU-6 | MMU-3 | MMU-11 | MMU-5 | MMU-2 | MMU-4 | MMU-7 | MMU-9 |       |
|-------------------------|----------------------|-------|-------|--------|-------|-------|-------|-------|-------|-------|
| Body Weight (kg)        | Days after infection | -2    | 5.72  | 9.40   | 8.81  | 4.36  | 8.13  | 6.40  | 5.08  | 7.25  |
|                         |                      | 0     | 5.04  | 9.14   | 7.01  | 4.00  | 8.04  | 6.56  | 5.16  | 7.91  |
|                         |                      | 2     | 6.46  | 10.49  | 6.78  | 4.82  | 7.56  | 5.90  | 4.92  | 7.03  |
|                         |                      | 4     | 5.98  | 10.26  | 6.92  | 5.12  | 7.45  | 6.14  | 5.03  | 6.99  |
|                         |                      | 6     | 6.14  | 9.56   | 7.21  | 4.98  | 7.88  | 6.09  | 5.77  | 7.82  |
| Rectal temperature (°C) | Days after infection | -2    | 100.4 | 100.2  | 101.6 | 99.9  | 99.1  | 100.6 | 99.6  | 100.6 |
|                         |                      | 0     | 99.7  | 101.1  | 102.1 | 100.6 | 100.3 | 99.9  | 101.9 | 101.6 |
|                         |                      | 2     | 100.7 | 99.7   | 103.3 | 103.2 | 101.9 | 101.2 | 103.4 | 102.2 |
|                         |                      | 4     | 100.1 | 100.4  | 103.4 | 102.6 | 99.9  | 101.0 | 102.9 | 101.4 |
|                         |                      | 6     | 100.4 | 100.3  | 101.7 | 100.1 | 101.2 | 100.9 | 103.2 | 101.6 |
| Heart rate (bpm)        | Days after infection | -2    | 144   | 136    | 165   | 121   | 176   | 151   | 191   | 145   |
|                         |                      | 0     | 164   | 140    | 171   | 123   | 181   | 159   | 169   | 138   |
|                         |                      | 2     | 157   | 134    | 182   | 136   | 166   | 162   | 199   | 147   |
|                         |                      | 4     | 141   | 139    | 169   | 144   | 159   | 158   | 196   | 160   |
|                         |                      | 6     | 151   | 142    | 168   | 135   | 177   | 157   | 197   | 152   |
| SpO2                    | Days after infection | -2    | 97    | 99     | 99    | 99    | 100   | 99    | 100   | 99    |
|                         |                      | 0     | 97    | 100    | 98    | 97    | 99    | 98    | 97    | 99    |
|                         |                      | 2     | 98    | 98     | 97    | 97    | 97    | 98    | 97    | 98    |
|                         |                      | 4     | 96    | 99     | 97    | 98    | 99    | 98    | 98    | 97    |
|                         |                      | 6     | 97    | 100    | 97    | 98    | 99    | 99    | 97    | 99    |

# Data S1 - Detailed measurements related to COVID-19 development in infected monkeys.

| Animal number                    | Responsiveness/recumbency | Discharges                            | Coughing/sneezing                           | Respiratory character                | Respiratory Rate (breaths per min) | Food consumption                                    |
|----------------------------------|---------------------------|---------------------------------------|---------------------------------------------|--------------------------------------|------------------------------------|-----------------------------------------------------|
| <b>MMU-6</b><br>Female<br>4 Y.O  | -1 BAR, active            | None                                  | None                                        | WNL                                  | 33                                 | 2 chow, 0 apple, 0 veg, 12 df, 2 fb, peanuts        |
|                                  | 0 BAR, active             | None                                  | None                                        | WNL                                  | 35                                 | 2 chow, 2 apple, 1 veg, 9 df, 2 fb, peanuts         |
|                                  | 1 BAR                     | None                                  | None                                        | WNL, minor shallow breath late       | 40                                 | 2 chow, 2 apple, 1 veg, 9 df, 2 fb, peanuts         |
|                                  | 2 BAR                     | None                                  | None                                        | WNL                                  | 32                                 | 6 chow, 0 apple, 0 veg, 4 df, 2 fb, peanuts         |
|                                  | 3 BAR, active             | None                                  | None                                        | WNL                                  | 42                                 | 4 chow, 2 apple, 1 veg, 5 df, 1 fb, peanuts         |
|                                  | 4 BAR                     | None                                  | None                                        | WNL                                  | 36                                 | 2 chow, 0 apple, 0 veg, 8 df, 3 fb, peanuts         |
|                                  | 5 BAR                     | None                                  | None                                        | WNL                                  | 42                                 | 0 chow, 2 apple, 2 veg, 8 df, 4 fb, peanuts         |
| <b>MMU-3</b><br>Female<br>5 Y.O  | 6 BAR                     | None                                  | None                                        | WNL                                  | 42                                 | 0 chow, 0 apple, 1 veg, 9 df, 3 fb, peanuts         |
|                                  | 7 BAR, active             | None                                  | None                                        | WNL                                  | 42                                 | 4 chow, 1 apple, 2 veg, 15 df, 2 fb, peanuts        |
|                                  | -1 BAR, lip-smacking      | None                                  | None                                        | WNL                                  | 42                                 | 2 chow, 2 apple, 5 df, 1 fb, peanuts                |
|                                  | 0 BAR                     | None                                  | None                                        | WNL                                  | 40                                 | 2 chow, 2 apple, 2 veg, 2 df, 4 fb, peanuts         |
|                                  | 1 BAR, timid              | None                                  | None                                        | WNL                                  | 36                                 | 4 chow, 4 apple, 3 veg, 5 df, 3 fb, peanuts         |
|                                  | 2 BAR                     | None                                  | None                                        | WNL                                  | 36                                 | 2 chow, 2 apple, 3 veg, 8 df, 3 fb, peanuts         |
|                                  | 3 BAR, timid              | None                                  | None                                        | WNL, quick shallow breath all day    | 42                                 | 3 chow, 1 apple, 2 veg, 5 df, 2 fb, 1 banana        |
| <b>MMU-11</b><br>Male<br>4 Y.O   | 4 BAR                     | None                                  | None                                        | WNL                                  | 36                                 | 4 chow, 1 apple, 0 df, 6 fb, peanuts                |
|                                  | 5 BAR, timid              | None                                  | None                                        | WNL                                  | 36                                 | 2 chow, 1 apple, 2 veg, 12 df, 2 fb, peanuts        |
|                                  | 6 BAR                     | None                                  | None                                        | WNL                                  | 36                                 | 4 chow, 2 apple, 3 veg, 7 df, 2 fb, peanuts         |
|                                  | 7 BAR                     | None                                  | None                                        | WNL                                  | 42                                 | 4 chow, 1 apple, 2 veg, 12 df, 4 fb, peanuts        |
|                                  | -1 BAR, active            | None                                  | None                                        | WNL                                  | 48                                 | 5 chow, 1 apple, 1 banana, 1 veg, 9 df, 2 fb        |
|                                  | 0 BAR, anxious            | None                                  | None                                        | WNL                                  | 54                                 | 2 chow, 2 apple, 2 veg, 9 df, 2 fb, peanuts         |
|                                  | 1 BAR, anxious            | None                                  | None                                        | WNL, minor ketamine reaction         | 42                                 | 1 chow, 2 apple, 0 veg, 4 df, 6 fb, peanuts         |
| <b>MMU-5</b><br>Female<br>6 Y.O  | 2 BAR                     | Mild discharges                       | A couple of coughs AM                       | WNL, minor shallow breath            | 48                                 | 1 chow, 2 apple, 2 veg, 7 df, 8 fb, peanuts         |
|                                  | 3 BAR, anxious            | Mild discharges on both nares         | Cough with sneeze heard twice               | WNL, mild nasal flaring              | 54                                 | 3 chow, 3 apple, 2 veg, 9 df, 4 fb, 1 banana        |
|                                  | 4 BAR                     | Mild discharge with later sneeze      | Minor cough and sneezing all day            | WNL, mild nasal flaring all day      | 42                                 | 2 chow, 2 apple, 2 veg, 4 df, 8 fb, peanuts         |
|                                  | 5 BAR, active             | None                                  | None                                        | WNL                                  | 48                                 | 0 chow, 4 apple, 4 veg, 10 df, peanuts              |
|                                  | 6 BAR, active             | None                                  | None                                        | WNL                                  | 48                                 | 2 chow, 3 apple, 6 veg, 7 df, peanuts               |
|                                  | 7 BAR, active             | None                                  | None                                        | WNL                                  | 50                                 | 5 chow, 2 apple, 3 veg, 8 df, 8 fb, peanuts         |
|                                  | 0 BAR, timid              | None                                  | None                                        | WNL                                  | 37                                 | 4 chow, 2 apple, 2 veg, 9 df, 2 fb, peanuts         |
| <b>MMU-2</b><br>Female<br>20 Y.O | 1 BAR, timid              | None                                  | None                                        | WNL                                  | 40                                 | 4 chow, 0 apple, 0 veg, 15 df, 2 fb, peanuts        |
|                                  | 2 BAR, timid              | Small amount bilateral                | Later cough at PM                           | WNL, intermittent apneustic pattern  | 44                                 | 4 chow, 1 apple, 1 veg, 10 df, 1 fb, peanuts        |
|                                  | 3 BAR                     | None initially, later clear R-side    | Minor cough at PM                           | WNL, quick shallow breath            | 48                                 | 2 chow, 1/2 apple, 3 veg, 11 df, 6 fb, peanuts      |
|                                  | 4 BAR, active             | Small amount bilateral                | Minor dry cough all day                     | WNL, quick shallow breath            | 50                                 | 4 chow, 1 apple, 2 veg, 9 df, 4 fb, 1/2 banana      |
|                                  | 5 BAR                     | Mild dried discharges                 | Minor cough all day                         | WNL                                  | 48                                 | 2 chow, 2 apple, 2 veg, 4 df, 8 fb, peanuts         |
|                                  | 6 BAR, pacing             | Mild dried discharges                 | Vel heard sneezing twice                    | WNL                                  | 42                                 | 2 chow, 1/2 apple, 3 veg, 11 df, 7 fb, peanuts      |
|                                  | 7 BAR                     | None                                  | None                                        | WNL                                  | 44                                 | 4 chow, 2 apple, 2 veg, 10 df, 6 fb, peanuts        |
| <b>MMU-4</b><br>Female<br>24 Y.O | -1 BAR, active            | None                                  | None                                        | WNL                                  | 40                                 | 4 chow, 1 apple, 3 veg, 5 df, 2 fb, peanuts         |
|                                  | 0 BAR, anxious            | None                                  | None                                        | WNL                                  | 39                                 | 2 chow, 1/2 apple, 1 veg, 6 df, 1 fb, peanuts       |
|                                  | 1 BAR, anxious            | None                                  | None                                        | WNL                                  | 42                                 | 1 chow, 1/2 apple, 1/2 banana, 10 df, 1 fb, peanuts |
|                                  | 2 BAR                     | None                                  | None                                        | WNL, occasional quick shallow breath | 50                                 | 3 chow, 2 apple, 2 veg, 2 df, 5 fb, peanuts         |
|                                  | 3 BAR, anxious            | None at Obs, observed coughing later  | None at Obs, heard sneezing at 9:55 AM      | WNL, occasional quick shallow breath | 53                                 | 3 chow, 1 apple, 6 df, 4 fb, peanuts                |
|                                  | 4 BAR                     | None at Obs, small amount later       | None at Obs, cough earlier in front of tech | Mild nasal flaring with each breath  | 51                                 | 2 chow, 3 apple, 10 df, 5 fb, peanuts               |
|                                  | 5 BAR, active             | Mild dried discharges                 | Minor cough and sneezing all day            | Mild nasal flaring                   | 53                                 | 2 chow, 3 apple, 2 veg, 8 df, 1 fb, peanuts         |
| <b>MMU-7</b><br>Female<br>22 Y.O | 6 BAR, pacing             | None                                  | None                                        | WNL                                  | 49                                 | 3 chow, 2 apple, 8 veg, 4 df, 2 fb, peanuts         |
|                                  | 7 BAR                     | None                                  | None                                        | WNL                                  | 48                                 | 4 chow, 1 apple, 3 veg, 7 df, 3 fb, peanuts         |
|                                  | -1 BAR, timid             | None                                  | None                                        | WNL                                  | 38                                 | 2 chow, 1/2 apple, 0 veg, 13 df, 2 fb, peanuts      |
|                                  | 0 BAR                     | None                                  | None                                        | WNL                                  | 40                                 | 3 chow, 2 apple, 8 df, 5 fb, peanuts                |
|                                  | 1 BAR                     | None                                  | None                                        | WNL, mild ketamine reaction          | 42                                 | 1 chow, 2 apple, 12 df, 4 df, 6 fb, peanuts         |
|                                  | 2 BAR                     | None                                  | None                                        | WNL, mild ketamine reaction          | 44                                 | 2 chow, 3 apple, 1 veg, 3 df, 2 fb, peanuts         |
|                                  | 3 BAR                     | Clear nasal discharge w/ sneeze later | A couple of coughs at PM                    | Tachypnea without increased effort   | 48                                 | 3 chow, 3 apple, 1/2 banana, 3 fb, peanuts          |
| <b>MMU-9</b><br>Female<br>18 Y.O | 4 BAR, active             | None at Obs, small amount later       | Minor dried discharge on both nares         | Mild nasal flaring                   | 50                                 | 2 chow, 4 df, 2 fb, peanuts                         |
|                                  | 5 BAR, active             | Mild dried discharges                 | Minor dried discharges                      | Mild tachypnea                       | 50                                 | 1 chow, 1 apple, 1/2 banana, 4 fb, peanuts          |
|                                  | 6 BAR, pacing             | None                                  | None                                        | Few episodes of quick shallow breath | 44                                 | 2 chow, 1 apple, 1/2 banana, peanuts                |
|                                  | 7 BAR                     | None                                  | None                                        | WNL                                  | 44                                 | 2 chow, 1 apple, 2 df, 2 fb, peanuts                |
|                                  | -1 BAR, active            | None                                  | None                                        | WNL                                  | 39                                 | 2 chow, 2 apple, 1 veg, 9 df, 6 fb, peanuts         |
|                                  | 0 BAR, active             | None initially, later clear           | Single dry cough                            | WNL                                  | 39                                 | 2 chow, 2 apple, 2 veg, 9 df, 2 fb, peanuts         |
|                                  | 1 BAR, active             | Small amount bilateral                | A couple of coughs AM                       | WNL                                  | 42                                 | 2 chow, 3 apple, 3 veg, 4 df, 4 fb, peanuts         |
| <b>MMU-6</b><br>Female<br>4 Y.O  | 2 BAR, active             | Small amount bilateral                | Minor dry cough all day                     | Mild increase in abdominal component | 48                                 | 4 chow, 1 apple, 1/2 veg, 4 df, 8 fb, peanuts       |
|                                  | 3 BAR, active             | Mild dried discharges                 | Minor dry cough all day                     | Mild nasal flaring with each breath  | 52                                 | 3 chow, 1 apple, 2 veg, 5 df, 8 fb, peanuts         |
|                                  | 4 BAR                     | Mild dried discharges                 | Minor cough and sneezing all day            | Mild nasal flaring with each breath  | 54                                 | 2 chow, 2 apple, 1 veg, 4 df, 3 fb, peanuts         |
|                                  | 5 BAR, active             | None                                  | Vel heard a single sneeze in the morning    | Mild nasal flaring with abd effort   | 50                                 | 4 chow, 2 apple, 1 veg, 7 df, 4 fb, peanuts         |
|                                  | 6 BAR, pacing             | None                                  | None                                        | Mild increased abd effort            | 48                                 | 3 chow, 1 apple, 1 veg, 6 df, 3 fb, peanuts         |
|                                  | 7 BAR                     | None                                  | None                                        | WNL, quick shallow breath            | 44                                 | 2 chow, 2 apple, 1 banana, 4 df, peanuts            |
|                                  | 0 BAR, threats            | None                                  | None                                        | WNL                                  | 41                                 | 4 chow, 2 apple, 1/2 banana, 3 fb, peanuts          |
| <b>MMU-9</b><br>Female<br>18 Y.O | 1 BAR, threats            | None                                  | None                                        | WNL                                  | 37                                 | 2 chow, 1 apple, 12 df, 2 df, 2 fb, peanuts         |
|                                  | 2 BAR                     | Mild dried discharge on nares         | Dry cough during PM                         | WNL, occasional quick shallow breath | 39                                 | 2 chow, 1 apple, 6 veg, 5 df, 4 fb, peanuts         |
|                                  | 3 BAR                     | Mild discharges                       | A couple of coughs AM                       | Mild increase in abdominal effort    | 40                                 | 3 chow, 2 apple, 3 veg, 4 df, 9 fb, peanuts         |
|                                  | 4 BAR, anxious            | Small amount bilateral                | Minor dry cough all day                     | Mild shallow breath                  | 39                                 | 2 chow, 1 apple, 1/2 veg, 2 fb, 6 fb, peanuts       |
|                                  | 5 BAR                     | Small amount bilateral                | Minor dry cough all day                     | WNL, occasional quick shallow breath | 41                                 | 3 chow, 2 apple, 4 veg, 5 df, 9 fb, peanuts         |
|                                  | 6 BAR                     | Mild dried discharges                 | Minor dry cough all day                     | WNL, mild nasal flaring              | 40                                 | 4 chow, 1 apple, 4 veg, 5 df, 4 fb, peanuts         |
|                                  | 7 BAR, timid              | Mild dried discharges                 | Single cough heard PM                       | WNL, mild nasal flaring              | 39                                 | 3 chow, 2 apple, 1 banana, 4 df, peanuts            |

Young infected group

Aged infected group
